# Supplementary material for: Comparative Evolution of Duplicated Ddx3 Genes in Teleosts: Insights from Japanese Flounder, Paralichthys olivaceus
Source: PubMed Central journal article supplement (PMC4528332; doi:10.1534/g3.115.018911), 2015-06-24
Supplement: supp_g3.115.018911_018911SI.pdf [file supp_g3.115.018911_018911SI.pdf]

Comparative Evolution of Duplicated *Ddx3* Genes in Teleosts: Insights from Japanese flounder,  
*Paralichthys olivaceus*

Zhongkai Wang, Wei Liu, Huayu Song, Huizhen Wang, Jinxiang Liu, Haitao Zhao, Xinxin Du,  
Quanqi Zhang

Key Laboratory of Marine Genetics and Breeding (MGB), Ministry of Education, College  
of Marine Life Sciences, Ocean University of China, Qingdao 266003, China

Corresponding author: Quanqi Zhang

Ocean University of China, No 5 Yushan Road, Qingdao 266003, China.

Tel./fax: +86 532 82031806

E-mail: qzhang@ouc.edu.cn

DOI: 10.1534/g3.115.018911

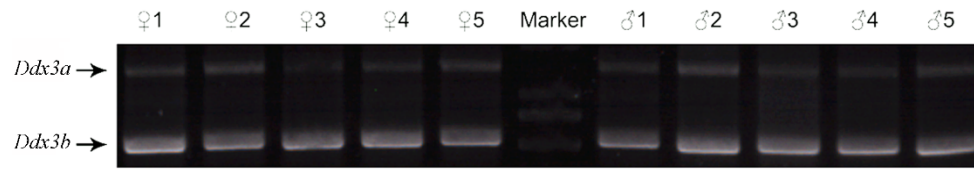

**Figure S1** Sex-specific amplification of *Ddx3* genes in Japanese flounder. Using the genomic DNA of females or males as templates, the amplification products of *Ddx3* genes showed no sexual specificity.

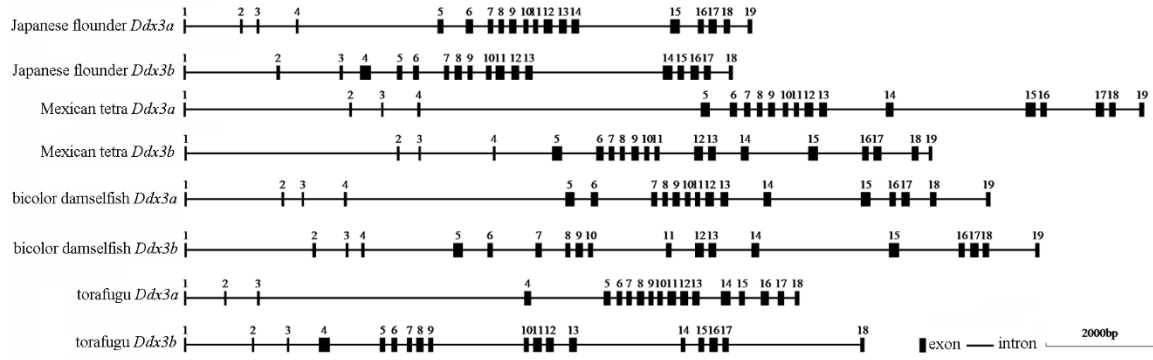

**Figure S2** Genomic structure of teleost *Ddx3a* and *Ddx3b* genes.

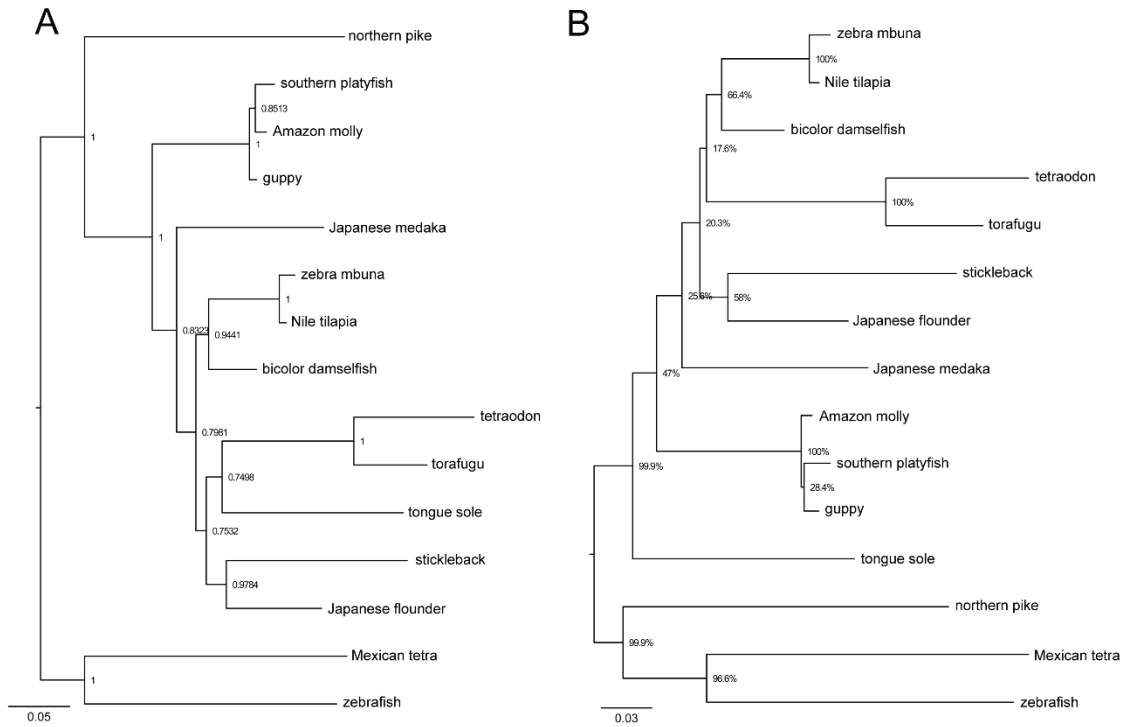

**Figure S3** Phylogenetic tree of teleost *Ddx3a* genes used in PAML analysis. (A) Bayesian tree of teleost *Ddx3a* genes. Numbers at the nodes are Bayesian posterior probabilities. Scale bar = 0.05. (B) Maximum likelihood tree of teleost *Ddx3a* genes. Numbers at the nodes are bootstrap support values. Scale bar = 0.03. Phylogenetic reconstructions were based on the coding sequences of *Ddx3a* genes. The accession numbers of these genes at GenBank or Ensembl database are provided in Table S1.

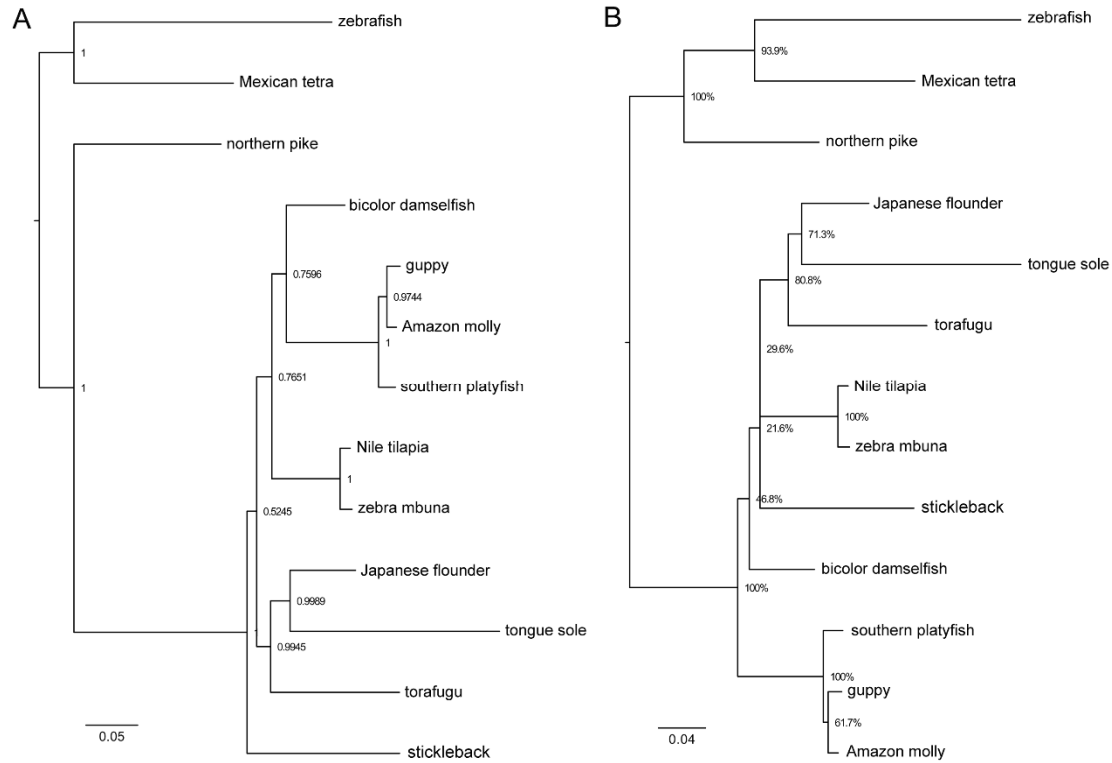

**Figure S4** Phylogenetic tree of teleost *Ddx3b* genes used in PAML analysis. (A) Bayesian tree of teleost *Ddx3b* genes. Numbers at the nodes are Bayesian posterior probabilities. Scale bar = 0.05. (B) Maximum likelihood tree of teleost *Ddx3b* genes. Numbers at the nodes are bootstrap support values. Scale bar = 0.04. Phylogenetic reconstructions were based on the coding sequences of *Ddx3b* genes. The accession numbers of these genes at GenBank or Ensembl database are provided in Table S1.

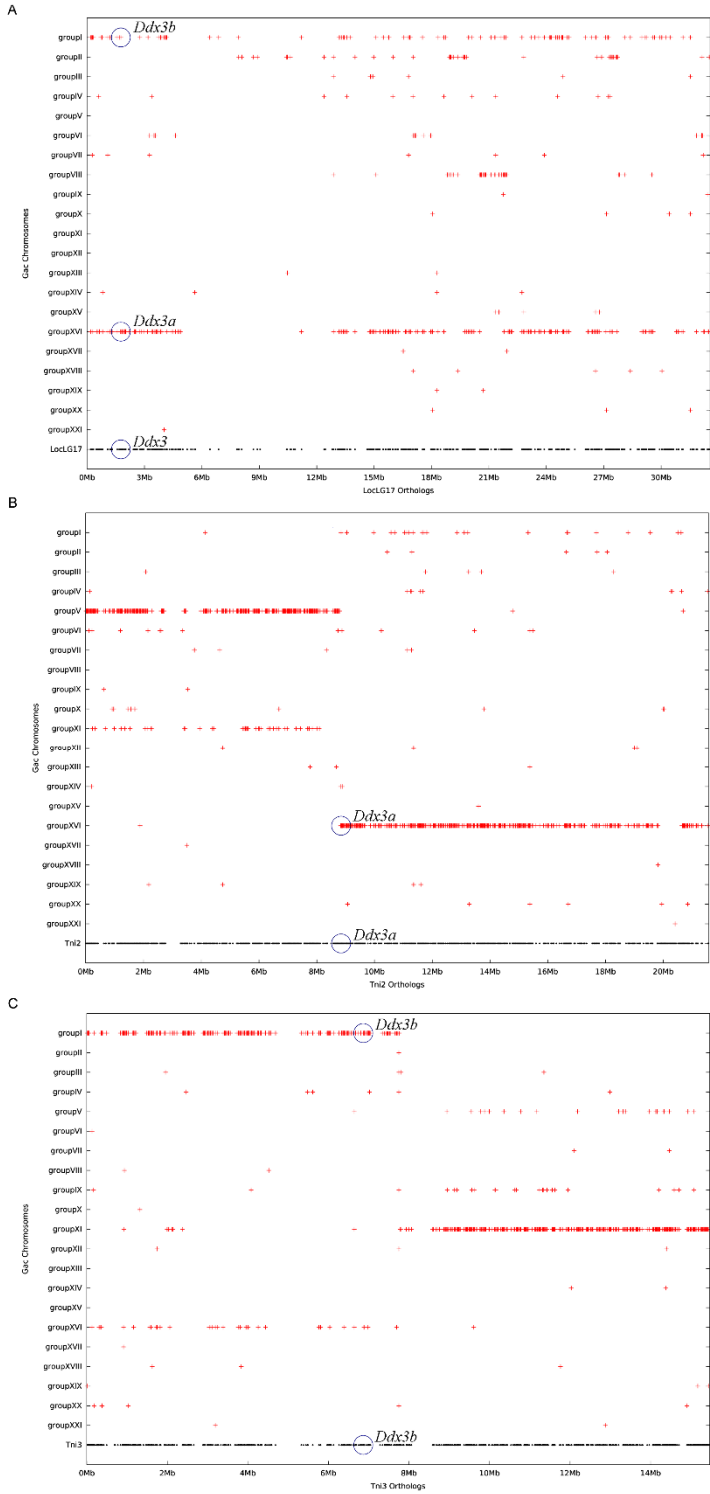

**Figure S5** Detection of conserved chromosome among teleosts. Synteny analysis of spotted gar LG17 (A), tetraodon Tni2 (B), and tetraodon Tni3 (C) and stickleback chromosomes. Stickleback *Ddx3a* is in groupXVI and *Ddx3b* is in groupI.

**Table S1 List of taxa used in this study.**

| Organism Name                       | Common Name                  | Assembly ID                        | Gene         | Accession No.  |
|-------------------------------------|------------------------------|------------------------------------|--------------|----------------|
| <i>Homo sapiens</i>                 | human                        | GRCh38                             | <i>Ddx3X</i> | NM_001356.3    |
|                                     |                              |                                    | <i>Ddx3Y</i> | NM_001122665.1 |
| <i>Mus musculus</i>                 | house mouse                  | GRCm38.p2                          | <i>Ddx3X</i> | XM_006527566.1 |
|                                     |                              |                                    | <i>Ddx3Y</i> | XM_006531605.1 |
| <i>Bos taurus</i>                   | cattle                       | Bos_taurus_UMD_3.1.1               | <i>Ddx3X</i> | XM_005228286.2 |
|                                     |                              |                                    | <i>Ddx3Y</i> | XM_005228498.2 |
| <i>Pan troglodytes</i>              | chimpanzee                   | Pan_troglodytes-2.1.4              | <i>Ddx3X</i> | XM_009438962.1 |
|                                     |                              |                                    | <i>Ddx3Y</i> | XM_009439896.1 |
| <i>Monodelphis domestica</i>        | gray short-tailed<br>opossum | MonDom5                            | <i>Ddx3</i>  | XM_007493339.1 |
| <i>Ornithorhynchus<br/>anatinus</i> | platypus                     | Ornithorhynchus_<br>anatinus-5.0.1 | <i>Ddx3</i>  | XM_007667286.1 |
| <i>Gallus gallus</i>                | chicken                      | Gallus_gallus-4.0                  | <i>Ddx3</i>  | NM_001030800.1 |
| <i>Anolis carolinensis</i>          | green anole                  | AnoCar2.0                          | <i>Ddx3</i>  | XM_008107404.1 |
| <i>Xenopus tropicalis</i>           | western clawed<br>frog       | Xtropicalis_v7                     | <i>Ddx3</i>  | NM_203865.1    |
| <i>Latimeria chalumnae</i>          | coelacanth                   | LatCha1                            | <i>Ddx3</i>  | XM_006005839.1 |
| <i>Callorhynchus milii</i>          | elephant shark               | Callorhynchus_<br>milii-6.1.3      | <i>Ddx3</i>  | XM_007901579.1 |
| <i>Lepisosteus oculatus</i>         | spotted gar                  | LepOcu1                            | <i>Ddx3</i>  | XM_006638889.1 |
| <i>Danio rerio</i>                  | zebrafish                    | GRCz10                             | <i>Ddx3a</i> | NM_130941.2    |
|                                     |                              |                                    | <i>Ddx3b</i> | NM_001126423.1 |
| <i>Astyanax mexicanus</i>           | Mexican tetra                | Astyanax_<br>mexicanus-1.0.2       | <i>Ddx3a</i> | XM_007227851.1 |
|                                     |                              |                                    | <i>Ddx3b</i> | XM_007244224.1 |
| <i>Esox lucius</i>                  | northern pike                | EsoLuc1.0                          | <i>Ddx3a</i> | XM_010889977.1 |
|                                     |                              |                                    | <i>Ddx3b</i> | XM_010886335.1 |
| <i>Stegastes partitus</i>           | bicolor damselfish           | Stegastes_partitus-1.0.2           | <i>Ddx3a</i> | XM_008279959.1 |
|                                     |                              |                                    | <i>Ddx3b</i> | XM_008292391.1 |
| <i>Poecilia reticulata</i>          | guppy                        | Guppy_female_1.0+MT                | <i>Ddx3a</i> | XM_008437108.1 |

|                               |                    |                                 |              |                    |
|-------------------------------|--------------------|---------------------------------|--------------|--------------------|
|                               |                    |                                 | <i>Ddx3b</i> | XM_008426133.1     |
| <i>Oreochromis niloticus</i>  | Nile tilapia       | Orenil1.1                       | <i>Ddx3a</i> | XM_005475255.1     |
|                               |                    |                                 | <i>Ddx3b</i> | NT_167568.1        |
| <i>Cynoglossus semilaevis</i> | tongue sole        | Cse_v1.0                        | <i>Ddx3a</i> | XM_008327813.1     |
|                               |                    |                                 | <i>Ddx3b</i> | XM_008324681.1     |
| <i>Takifugu rubripes</i>      | torafugu           | FUGU5                           | <i>Ddx3a</i> | XM_003961572.1     |
|                               |                    |                                 | <i>Ddx3b</i> | XM_003966411.1     |
| <i>Oryzias latipes</i>        | Japanese medaka    | ASM31367v1                      | <i>Ddx3a</i> | XM_004081602.1     |
|                               |                    |                                 | <i>Ddx3b</i> | XM_004085517.1     |
| <i>Paralichthys olivaceus</i> | Japanese flounder  | unpublished                     | <i>Ddx3a</i> | KP205082           |
|                               |                    |                                 | <i>Ddx3b</i> | KP205083           |
| <i>Poecilia formosa</i>       | Amazon molly       | Poecilia_formosa-5.1.2          | <i>Ddx3a</i> | XM_007571428.1     |
|                               |                    |                                 | <i>Ddx3b</i> | XM_007572225.1     |
| <i>Xiphophorus maculatus</i>  | southern platyfish | Xiphophorus_<br>maculatus-4.4.2 | <i>Ddx3a</i> | XM_005803788.1     |
|                               |                    |                                 | <i>Ddx3b</i> | XM_005813094.1     |
| <i>Maylandia zebra</i>        | zebra mbuna        | MetZeb1.1                       | <i>Ddx3a</i> | XM_004566279.1     |
|                               |                    |                                 | <i>Ddx3b</i> | XM_004573843.1     |
| <i>Tetraodon nigroviridis</i> | tetraodon          | TETRAODON 8.0                   | <i>Ddx3a</i> | ENSTNIG00000011569 |
|                               |                    |                                 | <i>Ddx3b</i> | ENSTNIG00000014514 |
| <i>Gasterosteus aculeatus</i> | stickleback        | BROAD S1                        | <i>Ddx3a</i> | ENSGACG00000008206 |
|                               |                    |                                 | <i>Ddx3b</i> | ENSGACG00000014407 |

---



**Table S2 Sequences of primers used for cloning Japanese flounder *Ddx3* genes.**

| Primers   | Sequence(5'-3')         | Product | usage   |
|-----------|-------------------------|---------|---------|
| ddx3-1_FW | TTTCTGTACCACGAAGGTTACGC | 1370 bp | PCR     |
| ddx3-1_RV | CATAGCCGTCATTGCTGTAGAAG |         |         |
| ddx3-2_FW | ATTGGAACAGGAGCATTTGACC  | 512 bp  | PCR     |
| ddx3-2_RV | GTCAGAGGCTTTGAATGGGGT   |         |         |
| DDX3-1-FW | GATGCTCCAAAAACGATTCAC   | 128 bp  | RT-qPCR |
| DDX3-1-RV | ATTCCTCTATCATTGCGAGGG   |         |         |
| DDX3-2-FW | ATGCCATTCCAATCGTCAAG    | 289 bp  | RT-qPCR |
| DDX3-2-RV | TACACAACACAGGGACGCACT   |         |         |

**Table S3 Results of site model analyses on teleost *Ddx3* Bayesian gene trees.**

| Tree                    | Mod     | lnL     | $\kappa$    | Parameters <sup>a</sup> |              |                     | Nul    | LRT    | d           | <i>P</i>    |
|-------------------------|---------|---------|-------------|-------------------------|--------------|---------------------|--------|--------|-------------|-------------|
|                         |         |         |             | $\omega/p$              | $\omega_1/q$ | $\omega_2/\omega_p$ |        |        |             |             |
| <i>Ddx3</i><br><i>a</i> | M0      | -       | 1.82        | 0.077                   |              |                     | n/a    |        |             |             |
|                         |         | 12032.6 | 7           |                         |              |                     |        |        |             |             |
|                         |         | 10      |             |                         |              |                     |        |        |             |             |
|                         | M1a     | -       | 1.94        | 0.042(89.94             | 1.000(10.06  |                     | n/a    |        |             |             |
|                         |         | 11821.5 | 1           | %)                      | %)           |                     |        |        |             |             |
|                         |         | 69      |             |                         |              |                     |        |        |             |             |
|                         | M2a     | -       | 1.94        | 0.042(89.94             | 1.000(10.06  | 87.302(0)           | M1     | 0      | 2           | <b>1.00</b> |
|                         |         | 11821.5 | 1           | %)                      | %)           |                     | a      |        |             | <b>0</b>    |
|                         |         | 69      |             |                         |              |                     |        |        |             |             |
|                         | M3      | -       | 1.82        | 0.013(74.72             | 0.224(20.60  | 0.750(4.68          | M0     | 603.50 | 4           | <b>0</b>    |
|                         | 11730.8 | 9       | %)          | %)                      | %)           |                     | 6      |        |             |             |
|                         | 57      |         |             |                         |              |                     |        |        |             |             |
| M7                      | -       | 1.82    | 0.198       | 1.828                   |              | n/a                 |        |        |             |             |
|                         | 11734.9 | 3       |             |                         |              |                     |        |        |             |             |
|                         | 89      |         |             |                         |              |                     |        |        |             |             |
| M8a                     | -       | 1.84    | 0.223       | 2.257                   | 1.000(3.71   | n/a                 |        |        |             |             |
|                         | 11739.4 | 9       |             |                         | %)           |                     |        |        |             |             |
|                         | 84      |         |             |                         |              |                     |        |        |             |             |
| M8                      | -       | 1.82    | 0.207       | 2.044                   | 2.600(0.35   | M7                  | 7.498  | 2      | <b>0.02</b> |             |
|                         | 11731.2 | 5       |             |                         | %)           |                     |        |        | <b>4</b>    |             |
|                         | 40      |         |             |                         |              |                     |        |        |             |             |
|                         |         |         |             |                         |              | M8                  | 16.488 | 1      | <b>0</b>    |             |
|                         |         |         |             |                         |              | a                   |        |        |             |             |
| <i>Ddx3</i>             | M0      | -       | 1.78        | 0.057                   |              |                     | n/a    |        |             |             |
|                         |         | 10420.5 | 2           |                         |              |                     |        |        |             |             |
|                         |         | 56      |             |                         |              |                     |        |        |             |             |
| M1a                     | -       | 1.85    | 0.046(95.77 | 1.000(4.23              |              | n/a                 |        |        |             |             |
|                         | 10373.0 | 7       | %)          | %)                      |              |                     |        |        |             |             |

|     |         |      |             |             |            |     |        |   |      |
|-----|---------|------|-------------|-------------|------------|-----|--------|---|------|
|     | 22      |      |             |             |            |     |        |   |      |
| M2a | -       | 1.85 | 0.046(95.77 | 1.000(4.23  | 48.098 (0) | M1  | 0      | 2 | 1.00 |
|     | 10373.0 | 7    | %)          | %)          |            | a   |        |   | 0    |
|     | 22      |      |             |             |            |     |        |   |      |
| M3  | -       | 1.77 | 0(52.95%)   | 0.084(37.85 | 0.324(9.20 | M0  | 264.91 | 4 | 0    |
|     | 10288.1 | 5    |             | %)          | %)         |     | 2      |   |      |
|     | 00      |      |             |             |            |     |        |   |      |
| M7  | -       | 1.77 | 0.286       | 4.080       |            | n/a |        |   |      |
|     | 10288.8 | 6    |             |             |            |     |        |   |      |
|     | 73      |      |             |             |            |     |        |   |      |
| M8a | -       | 1.77 | 0.230       | 2.738       | 1.000(0.65 | n/a |        |   |      |
|     | 10287.6 | 4    |             |             | %)         |     |        |   |      |
|     | 92      |      |             |             |            |     |        |   |      |
| M8  | -       | 1.78 | 0.306       | 4.687       | 1.449(0.41 | M7  | 4.496  | 2 | 0.10 |
|     | 10286.6 | 2    |             |             | %)         |     |        |   | 6    |
|     | 25      |      |             |             |            |     |        |   |      |
|     |         |      |             |             |            | M8  | 2.134  | 1 | 0.14 |
|     |         |      |             |             |            | a   |        |   | 4    |

Abbreviations: **lnL**, *ln* likelihood;  **$\kappa$** , transition/transversion ratio; **LRT**, likelihood ratio test statistic; **df**, degrees of freedom; **P**, P-value; **n/a**, not applicable.

<sup>a</sup>:  $\omega$  values of each site class are shown for models M0-M3 ( $\omega_0$ - $\omega_2$ ) with the proportion of each site class in parentheses. For M7-M8, the shape parameters, p and q, which describe the beta distribution are listed. In addition, the  $\omega$  value for the positively selected site class ( $\omega_p$ , with the proportion of sites in parentheses) is shown for M8a (where  $\omega_p$  is constrained to equal one) and M8.

**Table S4 Sites selected in *Ddx3a* by BEB in Bayesian tree.**

| Model | codon site | BEB                |           |       |
|-------|------------|--------------------|-----------|-------|
|       |            | Pr( $\omega > 1$ ) | post mean | +/-   |
| M8    | 43         | 0.513              | 1.070     | 0.459 |
|       | 89         | 0.583              | 1.132     | 0.451 |
|       | 131        | 0.578              | 1.135     | 0.443 |
|       | 151        | 0.577              | 1.140     | 0.436 |
|       | 176        | 0.860              | 1.392     | 0.275 |
|       | 199        | 0.571              | 1.136     | 0.435 |
|       | 219        | 0.562              | 1.124     | 0.441 |
|       | 429        | 0.962*             | 1.473     | 0.147 |
|       | 607        | 0.539              | 1.093     | 0.458 |
|       | 609        | 0.560              | 1.089     | 0.483 |
|       | 616        | 0.980*             | 1.486     | 0.109 |
|       | 620        | 0.763              | 1.306     | 0.358 |

\*: posterior probability > 0.95

**Table S5 Results of site model analyses on teleost *Ddx3* ML gene trees.**

| Tree         | Model | lnL            | $\kappa$ | Parameters <sup>a</sup> |               |                     | Null | LRT     | df | P            |
|--------------|-------|----------------|----------|-------------------------|---------------|---------------------|------|---------|----|--------------|
|              |       |                |          | $\omega_0/p$            | $\omega_1/q$  | $\omega_2/\omega_p$ |      |         |    |              |
| <i>Ddx3a</i> | M0    | -<br>12069.904 | 1.870    | 0.079                   |               |                     | n/a  |         |    |              |
|              | M1a   | -<br>11828.656 | 1.967    | 0.042(90.37%)           | 1.000(9.63%)  |                     | n/a  |         |    |              |
|              | M2a   | -<br>11828.656 | 1.967    | 0.042(90.37%)           | 1.000(9.63%)  | 37.503(0)           | M1a  | 0       | 2  | <b>1.000</b> |
|              | M3    | -<br>11746.341 | 1.872    | 0.013(74.49%)           | 0.217(20.62%) | 0.813(4.89%)        | M0   | 647.126 | 4  | <b>0</b>     |
|              | M7    | -<br>11753.109 | 1.865    | 0.190                   | 1.672         |                     | n/a  |         |    |              |
|              | M8a   | -<br>11753.656 | 1.891    | 0.224                   | 2.438         | 1.000(4.47%)        | n/a  |         |    |              |
|              | M8    | -<br>11745.686 | 1.873    | 0.242                   | 3.063         | 1.000(2.94%)        | M7   | 14.846  | 2  | <b>0</b>     |
|              |       |                |          |                         |               |                     | M8a  | 15.940  | 1  | <b>0</b>     |
| <i>Ddx3b</i> | M0    | -<br>10427.457 | 1.799    | 0.057                   |               |                     | n/a  |         |    |              |
|              | M1a   | -<br>10379.321 | 1.873    | 0.046(95.89%)           | 1.000(4.11%)  |                     | n/a  |         |    |              |
|              | M2a   | -<br>10379.321 | 1.873    | 0.046(95.89%)           | 1.000(4.11%)  | 50.201 (0)          | M1a  | 0       | 2  | <b>1.000</b> |
|              | M3    | -<br>10291.089 | 1.797    | 0.010(71.32%)           | 0.178(28.17%) | 1.431(0.51%)        | M0   | 272.736 | 4  | <b>0</b>     |
|              | M7    | -<br>10293.577 | 1.793    | 0.285                   | 4.030         |                     | n/a  |         |    |              |
|              | M8a   | -<br>10292.146 | 1.791    | 0.230                   | 2.714         | 1.000(0.67%)        | n/a  |         |    |              |
|              | M8    | -              | 1.800    | 0.306                   | 4.651         | 1.494(0.42%)        | M7   | 4.892   | 2  | <b>0.087</b> |

Abbreviations: **lnL**, *ln* likelihood;  **$\kappa$** , transition/transversion ratio; **LRT**, likelihood ratio test statistic; **df**, degrees of freedom; **P**, P-value; **n/a**, not applicable.

<sup>a</sup>:  $\omega$  values of each site class are shown for models M0-M3 ( $\omega_0$ - $\omega_2$ ) with the proportion of each site class in parentheses. For M7-M8, the shape parameters, p and q, which describe the beta distribution are listed. In addition, the  $\omega$  value for the positively selected site class ( $\omega_p$ , with the proportion of sites in parentheses) is shown for M8a (where  $\omega_p$  is constrained to equal one) and M8.

Table S6 Sites selected in *Ddx3a* by BEB in ML tree.

| Model | codon site | BEB                |           |       |
|-------|------------|--------------------|-----------|-------|
|       |            | Pr( $\omega > 1$ ) | post mean | +/-   |
| M8    | 9          | 0.585              | 1.127     | 0.460 |
|       | 43         | 0.604              | 1.157     | 0.438 |
|       | 89         | 0.581              | 1.129     | 0.453 |
|       | 111        | 0.651              | 1.198     | 0.426 |
|       | 123        | 0.842              | 1.368     | 0.314 |
|       | 176        | 0.850              | 1.383     | 0.285 |
|       | 199        | 0.765              | 1.309     | 0.353 |
|       | 219        | 0.654              | 1.211     | 0.409 |
|       | 429        | 0.983*             | 1.488     | 0.094 |
|       | 607        | 0.791              | 1.329     | 0.341 |
|       | 609        | 0.544              | 1.071     | 0.488 |
|       | 616        | 0.984*             | 1.489     | 0.092 |
|       | 620        | 0.837              | 1.370     | 0.301 |

\*: posterior probability > 0.95
