# Supplementary material for: Comparative Evolution of Duplicated Ddx3 Genes in Teleosts: Insights from Japanese Flounder, Paralichthys olivaceus
Source: PubMed Central journal article supplement (PMC4528332; doi:10.1534/g3.115.018911), 2015-06-24
Supplement: supp_g3.115.018911_FigureS1.pdf [file supp_g3.115.018911_FigureS1.pdf]

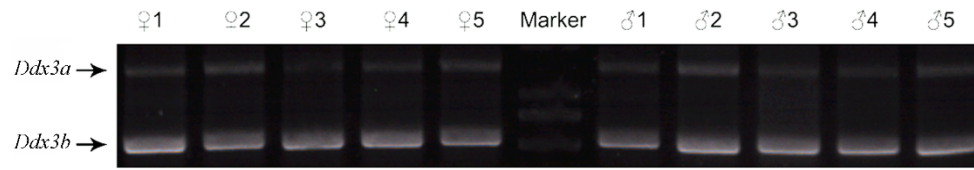

**Figure S1** Sex-specific amplification of *Ddx3* genes in Japanese flounder. Using the genomic DNA of females or males as templates, the amplification products of *Ddx3* genes showed no sexual specificity.
