# Supplementary material for: Comparative Evolution of Duplicated Ddx3 Genes in Teleosts: Insights from Japanese Flounder, Paralichthys olivaceus
Source: PubMed Central journal article supplement (PMC4528332; doi:10.1534/g3.115.018911), 2015-06-24
Supplement: supp_g3.115.018911_FigureS2.pdf [file supp_g3.115.018911_FigureS2.pdf]

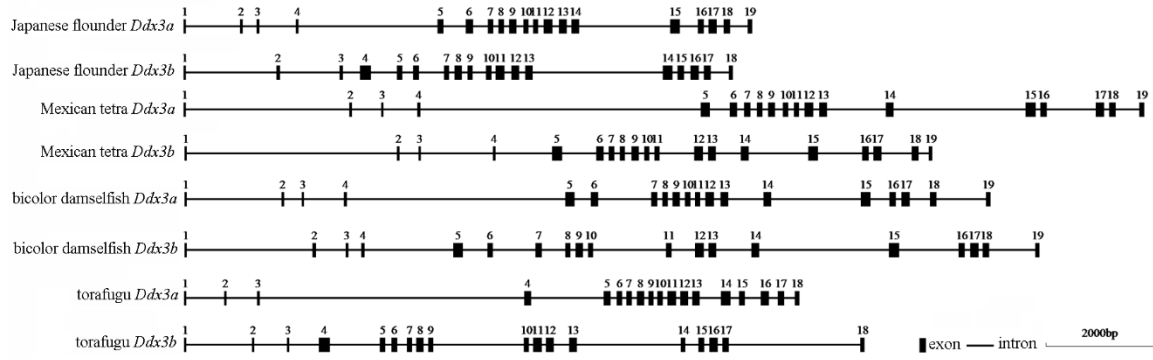

**Figure S2** Genomic structure of teleost *Ddx3a* and *Ddx3b* genes.
