# Supplementary material for: Comparative Evolution of Duplicated Ddx3 Genes in Teleosts: Insights from Japanese Flounder, Paralichthys olivaceus
Source: PubMed Central journal article supplement (PMC4528332; doi:10.1534/g3.115.018911), 2015-06-24
Supplement: supp_g3.115.018911_FigureS5.pdf [file supp_g3.115.018911_FigureS5.pdf]

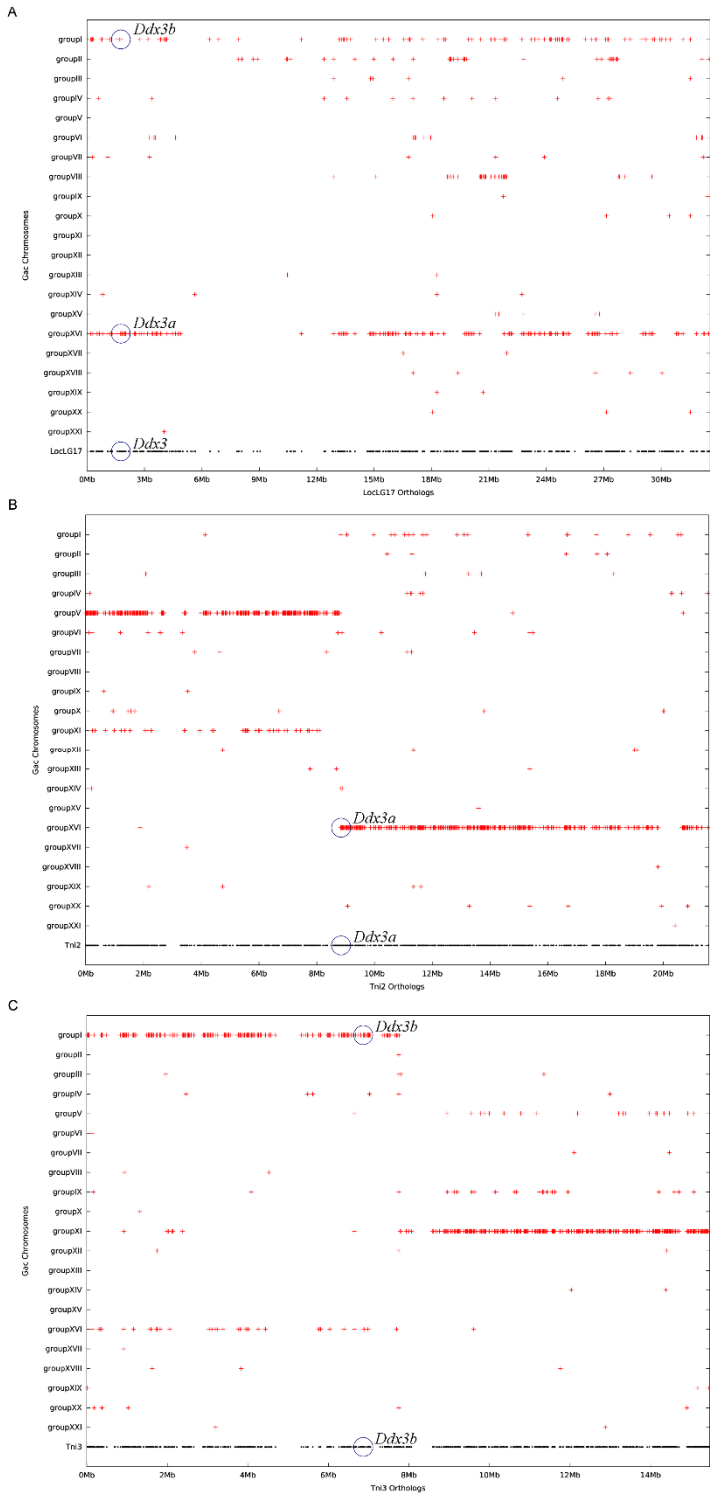

**Figure S5** Detection of conserved chromosome among teleosts. Synteny analysis of spotted gar LG17 (A), tetraodon Tni2 (B), and tetraodon Tni3 (C) and stickleback chromosomes. Stickleback *Ddx3a* is in groupXVI and *Ddx3b* is in groupI.
