# Supplementary material for: Comparative Evolution of Duplicated Ddx3 Genes in Teleosts: Insights from Japanese Flounder, Paralichthys olivaceus
Source: PubMed Central journal article supplement (PMC4528332; doi:10.1534/g3.115.018911), 2015-06-24
Supplement: supp_g3.115.018911_TableS1.pdf [file supp_g3.115.018911_TableS1.pdf]

**Table S1 List of taxa used in this study.**

| Organism Name                       | Common Name                  | Assembly ID                        | Gene         | Accession No.  |
|-------------------------------------|------------------------------|------------------------------------|--------------|----------------|
| <i>Homo sapiens</i>                 | human                        | GRCh38                             | <i>Ddx3X</i> | NM_001356.3    |
|                                     |                              |                                    | <i>Ddx3Y</i> | NM_001122665.1 |
| <i>Mus musculus</i>                 | house mouse                  | GRCm38.p2                          | <i>Ddx3X</i> | XM_006527566.1 |
|                                     |                              |                                    | <i>Ddx3Y</i> | XM_006531605.1 |
| <i>Bos taurus</i>                   | cattle                       | Bos_taurus_UMD_3.1.1               | <i>Ddx3X</i> | XM_005228286.2 |
|                                     |                              |                                    | <i>Ddx3Y</i> | XM_005228498.2 |
| <i>Pan troglodytes</i>              | chimpanzee                   | Pan_troglodytes-2.1.4              | <i>Ddx3X</i> | XM_009438962.1 |
|                                     |                              |                                    | <i>Ddx3Y</i> | XM_009439896.1 |
| <i>Monodelphis domestica</i>        | gray short-tailed<br>opossum | MonDom5                            | <i>Ddx3</i>  | XM_007493339.1 |
| <i>Ornithorhynchus<br/>anatinus</i> | platypus                     | Ornithorhynchus_<br>anatinus-5.0.1 | <i>Ddx3</i>  | XM_007667286.1 |
| <i>Gallus gallus</i>                | chicken                      | Gallus_gallus-4.0                  | <i>Ddx3</i>  | NM_001030800.1 |
| <i>Anolis carolinensis</i>          | green anole                  | AnoCar2.0                          | <i>Ddx3</i>  | XM_008107404.1 |
| <i>Xenopus tropicalis</i>           | western clawed<br>frog       | Xtropicalis_v7                     | <i>Ddx3</i>  | NM_203865.1    |
| <i>Latimeria chalumnae</i>          | coelacanth                   | LatCha1                            | <i>Ddx3</i>  | XM_006005839.1 |
| <i>Callorhynchus milii</i>          | elephant shark               | Callorhynchus_<br>milii-6.1.3      | <i>Ddx3</i>  | XM_007901579.1 |
| <i>Lepisosteus oculatus</i>         | spotted gar                  | LepOcu1                            | <i>Ddx3</i>  | XM_006638889.1 |
| <i>Danio rerio</i>                  | zebrafish                    | GRCz10                             | <i>Ddx3a</i> | NM_130941.2    |
|                                     |                              |                                    | <i>Ddx3b</i> | NM_001126423.1 |
| <i>Astyanax mexicanus</i>           | Mexican tetra                | Astyanax_<br>mexicanus-1.0.2       | <i>Ddx3a</i> | XM_007227851.1 |
|                                     |                              |                                    | <i>Ddx3b</i> | XM_007244224.1 |
| <i>Esox lucius</i>                  | northern pike                | EsoLuc1.0                          | <i>Ddx3a</i> | XM_010889977.1 |
|                                     |                              |                                    | <i>Ddx3b</i> | XM_010886335.1 |
| <i>Stegastes partitus</i>           | bicolor damselfish           | Stegastes_partitus-1.0.2           | <i>Ddx3a</i> | XM_008279959.1 |
|                                     |                              |                                    | <i>Ddx3b</i> | XM_008292391.1 |
| <i>Poecilia reticulata</i>          | guppy                        | Guppy_female_1.0+MT                | <i>Ddx3a</i> | XM_008437108.1 |

|                               |                    |                                 |              |                    |
|-------------------------------|--------------------|---------------------------------|--------------|--------------------|
|                               |                    |                                 | <i>Ddx3b</i> | XM_008426133.1     |
| <i>Oreochromis niloticus</i>  | Nile tilapia       | Orenil1.1                       | <i>Ddx3a</i> | XM_005475255.1     |
|                               |                    |                                 | <i>Ddx3b</i> | NT_167568.1        |
| <i>Cynoglossus semilaevis</i> | tongue sole        | Cse_v1.0                        | <i>Ddx3a</i> | XM_008327813.1     |
|                               |                    |                                 | <i>Ddx3b</i> | XM_008324681.1     |
| <i>Takifugu rubripes</i>      | torafugu           | FUGU5                           | <i>Ddx3a</i> | XM_003961572.1     |
|                               |                    |                                 | <i>Ddx3b</i> | XM_003966411.1     |
| <i>Oryzias latipes</i>        | Japanese medaka    | ASM31367v1                      | <i>Ddx3a</i> | XM_004081602.1     |
|                               |                    |                                 | <i>Ddx3b</i> | XM_004085517.1     |
| <i>Paralichthys olivaceus</i> | Japanese flounder  | unpublished                     | <i>Ddx3a</i> | KP205082           |
|                               |                    |                                 | <i>Ddx3b</i> | KP205083           |
| <i>Poecilia formosa</i>       | Amazon molly       | Poecilia_formosa-5.1.2          | <i>Ddx3a</i> | XM_007571428.1     |
|                               |                    |                                 | <i>Ddx3b</i> | XM_007572225.1     |
| <i>Xiphophorus maculatus</i>  | southern platyfish | Xiphophorus_<br>maculatus-4.4.2 | <i>Ddx3a</i> | XM_005803788.1     |
|                               |                    |                                 | <i>Ddx3b</i> | XM_005813094.1     |
| <i>Maylandia zebra</i>        | zebra mbuna        | MetZeb1.1                       | <i>Ddx3a</i> | XM_004566279.1     |
|                               |                    |                                 | <i>Ddx3b</i> | XM_004573843.1     |
| <i>Tetraodon nigroviridis</i> | tetraodon          | TETRAODON 8.0                   | <i>Ddx3a</i> | ENSTNIG00000011569 |
|                               |                    |                                 | <i>Ddx3b</i> | ENSTNIG00000014514 |
| <i>Gasterosteus aculeatus</i> | stickleback        | BROAD S1                        | <i>Ddx3a</i> | ENSGACG00000008206 |
|                               |                    |                                 | <i>Ddx3b</i> | ENSGACG00000014407 |

---
