# Supplementary material for: Comparative Evolution of Duplicated Ddx3 Genes in Teleosts: Insights from Japanese Flounder, Paralichthys olivaceus
Source: PubMed Central journal article supplement (PMC4528332; doi:10.1534/g3.115.018911), 2015-06-24
Supplement: supp_g3.115.018911_TableS2.pdf [file supp_g3.115.018911_TableS2.pdf]

**Table S2 Sequences of primers used for cloning Japanese flounder *Ddx3* genes.**

| Primers   | Sequence(5'-3')         | Product | usage   |
|-----------|-------------------------|---------|---------|
| ddx3-1_FW | TTTCTGTACCACGAAGGTTACGC | 1370 bp | PCR     |
| ddx3-1_RV | CATAGCCGTCATTGCTGTAGAAG |         |         |
| ddx3-2_FW | ATTGGAACAGGAGCATTTGACC  | 512 bp  | PCR     |
| ddx3-2_RV | GTCAGAGGCTTTGAATGGGGT   |         |         |
| DDX3-1-FW | GATGCTCCAAAAACGATTCAC   | 128 bp  | RT-qPCR |
| DDX3-1-RV | ATTCCTCTATCATTGCGAGGG   |         |         |
| DDX3-2-FW | ATGCCATTCCAATCGTCAAG    | 289 bp  | RT-qPCR |
| DDX3-2-RV | TACACAACACAGGGACGCACT   |         |         |
