# Supplementary material for: Comparative Evolution of Duplicated Ddx3 Genes in Teleosts: Insights from Japanese Flounder, Paralichthys olivaceus
Source: PubMed Central journal article supplement (PMC4528332; doi:10.1534/g3.115.018911), 2015-06-24
Supplement: supp_g3.115.018911_TableS3.pdf [file supp_g3.115.018911_TableS3.pdf]

**Table S3 Results of site model analyses on teleost *Ddx3* Bayesian gene trees.**

| Tree                    | Mod     | lnL     | $\kappa$    | Parameters <sup>a</sup> |              |                     | Nul    | LRT    | d           | <i>P</i>    |
|-------------------------|---------|---------|-------------|-------------------------|--------------|---------------------|--------|--------|-------------|-------------|
|                         |         |         |             | $\omega/p$              | $\omega_1/q$ | $\omega_2/\omega_p$ |        |        |             |             |
| <i>Ddx3</i><br><i>a</i> | M0      | -       | 1.82        | 0.077                   |              |                     | n/a    |        |             |             |
|                         |         | 12032.6 | 7           |                         |              |                     |        |        |             |             |
|                         |         | 10      |             |                         |              |                     |        |        |             |             |
|                         | M1a     | -       | 1.94        | 0.042(89.94             | 1.000(10.06  |                     | n/a    |        |             |             |
|                         |         | 11821.5 | 1           | %)                      | %)           |                     |        |        |             |             |
|                         |         | 69      |             |                         |              |                     |        |        |             |             |
|                         | M2a     | -       | 1.94        | 0.042(89.94             | 1.000(10.06  | 87.302(0)           | M1     | 0      | 2           | <b>1.00</b> |
|                         |         | 11821.5 | 1           | %)                      | %)           |                     | a      |        |             | <b>0</b>    |
|                         |         | 69      |             |                         |              |                     |        |        |             |             |
|                         | M3      | -       | 1.82        | 0.013(74.72             | 0.224(20.60  | 0.750(4.68          | M0     | 603.50 | 4           | <b>0</b>    |
|                         | 11730.8 | 9       | %)          | %)                      | %)           |                     | 6      |        |             |             |
|                         | 57      |         |             |                         |              |                     |        |        |             |             |
| M7                      | -       | 1.82    | 0.198       | 1.828                   |              | n/a                 |        |        |             |             |
|                         | 11734.9 | 3       |             |                         |              |                     |        |        |             |             |
|                         | 89      |         |             |                         |              |                     |        |        |             |             |
| M8a                     | -       | 1.84    | 0.223       | 2.257                   | 1.000(3.71   | n/a                 |        |        |             |             |
|                         | 11739.4 | 9       |             |                         | %)           |                     |        |        |             |             |
|                         | 84      |         |             |                         |              |                     |        |        |             |             |
| M8                      | -       | 1.82    | 0.207       | 2.044                   | 2.600(0.35   | M7                  | 7.498  | 2      | <b>0.02</b> |             |
|                         | 11731.2 | 5       |             |                         | %)           |                     |        |        | <b>4</b>    |             |
|                         | 40      |         |             |                         |              |                     |        |        |             |             |
|                         |         |         |             |                         |              | M8                  | 16.488 | 1      | <b>0</b>    |             |
|                         |         |         |             |                         |              | a                   |        |        |             |             |
| <i>Ddx3</i>             | M0      | -       | 1.78        | 0.057                   |              |                     | n/a    |        |             |             |
|                         |         | 10420.5 | 2           |                         |              |                     |        |        |             |             |
|                         |         | 56      |             |                         |              |                     |        |        |             |             |
| M1a                     | -       | 1.85    | 0.046(95.77 | 1.000(4.23              |              | n/a                 |        |        |             |             |
|                         | 10373.0 | 7       | %)          | %)                      |              |                     |        |        |             |             |

|     |         |      |             |             |            |     |        |   |      |
|-----|---------|------|-------------|-------------|------------|-----|--------|---|------|
|     | 22      |      |             |             |            |     |        |   |      |
| M2a | -       | 1.85 | 0.046(95.77 | 1.000(4.23  | 48.098 (0) | M1  | 0      | 2 | 1.00 |
|     | 10373.0 | 7    | %)          | %)          |            | a   |        |   | 0    |
|     | 22      |      |             |             |            |     |        |   |      |
| M3  | -       | 1.77 | 0(52.95%)   | 0.084(37.85 | 0.324(9.20 | M0  | 264.91 | 4 | 0    |
|     | 10288.1 | 5    |             | %)          | %)         |     | 2      |   |      |
|     | 00      |      |             |             |            |     |        |   |      |
| M7  | -       | 1.77 | 0.286       | 4.080       |            | n/a |        |   |      |
|     | 10288.8 | 6    |             |             |            |     |        |   |      |
|     | 73      |      |             |             |            |     |        |   |      |
| M8a | -       | 1.77 | 0.230       | 2.738       | 1.000(0.65 | n/a |        |   |      |
|     | 10287.6 | 4    |             |             | %)         |     |        |   |      |
|     | 92      |      |             |             |            |     |        |   |      |
| M8  | -       | 1.78 | 0.306       | 4.687       | 1.449(0.41 | M7  | 4.496  | 2 | 0.10 |
|     | 10286.6 | 2    |             |             | %)         |     |        |   | 6    |
|     | 25      |      |             |             |            |     |        |   |      |
|     |         |      |             |             |            | M8  | 2.134  | 1 | 0.14 |
|     |         |      |             |             |            | a   |        |   | 4    |

Abbreviations: **lnL**, *ln* likelihood;  **$\kappa$** , transition/transversion ratio; **LRT**, likelihood ratio test statistic; **df**, degrees of freedom; **P**, P-value; **n/a**, not applicable.

<sup>a</sup>:  $\omega$  values of each site class are shown for models M0-M3 ( $\omega_0$ - $\omega_2$ ) with the proportion of each site class in parentheses. For M7-M8, the shape parameters, p and q, which describe the beta distribution are listed. In addition, the  $\omega$  value for the positively selected site class ( $\omega_p$ , with the proportion of sites in parentheses) is shown for M8a (where  $\omega_p$  is constrained to equal one) and M8.
