# Supplementary material for: Comparative Evolution of Duplicated Ddx3 Genes in Teleosts: Insights from Japanese Flounder, Paralichthys olivaceus
Source: PubMed Central journal article supplement (PMC4528332; doi:10.1534/g3.115.018911), 2015-06-24
Supplement: supp_g3.115.018911_TableS4.pdf [file supp_g3.115.018911_TableS4.pdf]

**Table S4 Sites selected in *Ddx3a* by BEB in Bayesian tree.**

| Model | codon site | BEB                |           |       |
|-------|------------|--------------------|-----------|-------|
|       |            | Pr( $\omega > 1$ ) | post mean | +/-   |
| M8    | 43         | 0.513              | 1.070     | 0.459 |
|       | 89         | 0.583              | 1.132     | 0.451 |
|       | 131        | 0.578              | 1.135     | 0.443 |
|       | 151        | 0.577              | 1.140     | 0.436 |
|       | 176        | 0.860              | 1.392     | 0.275 |
|       | 199        | 0.571              | 1.136     | 0.435 |
|       | 219        | 0.562              | 1.124     | 0.441 |
|       | 429        | 0.962*             | 1.473     | 0.147 |
|       | 607        | 0.539              | 1.093     | 0.458 |
|       | 609        | 0.560              | 1.089     | 0.483 |
|       | 616        | 0.980*             | 1.486     | 0.109 |
|       | 620        | 0.763              | 1.306     | 0.358 |

\*: posterior probability > 0.95
