# Supplementary material for: Comparative Evolution of Duplicated Ddx3 Genes in Teleosts: Insights from Japanese Flounder, Paralichthys olivaceus
Source: PubMed Central journal article supplement (PMC4528332; doi:10.1534/g3.115.018911), 2015-06-24
Supplement: supp_g3.115.018911_TableS5.pdf [file supp_g3.115.018911_TableS5.pdf]

**Table S5 Results of site model analyses on teleost *Ddx3* ML gene trees.**

| Tree         | Model     | lnL       | $\kappa$ | Parameters <sup>a</sup> |               |                     | Null   | LRT     | df           | P            |
|--------------|-----------|-----------|----------|-------------------------|---------------|---------------------|--------|---------|--------------|--------------|
|              |           |           |          | $\omega_0/p$            | $\omega_1/q$  | $\omega_2/\omega_p$ |        |         |              |              |
| <i>Ddx3a</i> | M0        | -         | 1.870    | 0.079                   |               |                     | n/a    |         |              |              |
|              |           | 12069.904 |          |                         |               |                     |        |         |              |              |
|              | M1a       | -         | 1.967    | 0.042(90.37%)           | 1.000(9.63%)  |                     | n/a    |         |              |              |
|              |           | 11828.656 |          |                         |               |                     |        |         |              |              |
|              | M2a       | -         | 1.967    | 0.042(90.37%)           | 1.000(9.63%)  | 37.503(0)           | M1a    | 0       | 2            | <b>1.000</b> |
|              |           | 11828.656 |          |                         |               |                     |        |         |              |              |
|              | M3        | -         | 1.872    | 0.013(74.49%)           | 0.217(20.62%) | 0.813(4.89%)        | M0     | 647.126 | 4            | <b>0</b>     |
|              |           | 11746.341 |          |                         |               |                     |        |         |              |              |
| M7           | -         | 1.865     | 0.190    | 1.672                   |               | n/a                 |        |         |              |              |
|              | 11753.109 |           |          |                         |               |                     |        |         |              |              |
| M8a          | -         | 1.891     | 0.224    | 2.438                   | 1.000(4.47%)  | n/a                 |        |         |              |              |
|              | 11753.656 |           |          |                         |               |                     |        |         |              |              |
| M8           | -         | 1.873     | 0.242    | 3.063                   | 1.000(2.94%)  | M7                  | 14.846 | 2       | <b>0</b>     |              |
|              | 11745.686 |           |          |                         |               |                     |        |         |              |              |
|              |           |           |          |                         |               | M8a                 | 15.940 | 1       | <b>0</b>     |              |
| <i>Ddx3b</i> | M0        | -         | 1.799    | 0.057                   |               |                     | n/a    |         |              |              |
|              |           | 10427.457 |          |                         |               |                     |        |         |              |              |
|              | M1a       | -         | 1.873    | 0.046(95.89%)           | 1.000(4.11%)  |                     | n/a    |         |              |              |
|              |           | 10379.321 |          |                         |               |                     |        |         |              |              |
|              | M2a       | -         | 1.873    | 0.046(95.89%)           | 1.000(4.11%)  | 50.201 (0)          | M1a    | 0       | 2            | <b>1.000</b> |
|              |           | 10379.321 |          |                         |               |                     |        |         |              |              |
|              | M3        | -         | 1.797    | 0.010(71.32%)           | 0.178(28.17%) | 1.431(0.51%)        | M0     | 272.736 | 4            | <b>0</b>     |
|              |           | 10291.089 |          |                         |               |                     |        |         |              |              |
| M7           | -         | 1.793     | 0.285    | 4.030                   |               | n/a                 |        |         |              |              |
|              | 10293.577 |           |          |                         |               |                     |        |         |              |              |
| M8a          | -         | 1.791     | 0.230    | 2.714                   | 1.000(0.67%)  | n/a                 |        |         |              |              |
|              | 10292.146 |           |          |                         |               |                     |        |         |              |              |
| M8           | -         | 1.800     | 0.306    | 4.651                   | 1.494(0.42%)  | M7                  | 4.892  | 2       | <b>0.087</b> |              |

Abbreviations: **lnL**, *ln* likelihood;  **$\kappa$** , transition/transversion ratio; **LRT**, likelihood ratio test statistic; **df**, degrees of freedom; **P**, P-value; **n/a**, not applicable.

<sup>a</sup>:  $\omega$  values of each site class are shown for models M0-M3 ( $\omega_0$ - $\omega_2$ ) with the proportion of each site class in parentheses. For M7-M8, the shape parameters, p and q, which describe the beta distribution are listed. In addition, the  $\omega$  value for the positively selected site class ( $\omega_p$ , with the proportion of sites in parentheses) is shown for M8a (where  $\omega_p$  is constrained to equal one) and M8.
