# Supplementary material for: Comparative Evolution of Duplicated Ddx3 Genes in Teleosts: Insights from Japanese Flounder, Paralichthys olivaceus
Source: PubMed Central journal article supplement (PMC4528332; doi:10.1534/g3.115.018911), 2015-06-24
Supplement: supp_g3.115.018911_TableS6.pdf [file supp_g3.115.018911_TableS6.pdf]

Table S6 Sites selected in *Ddx3a* by BEB in ML tree.

| Model | codon site | BEB                |           |       |
|-------|------------|--------------------|-----------|-------|
|       |            | Pr( $\omega > 1$ ) | post mean | +/-   |
| M8    | 9          | 0.585              | 1.127     | 0.460 |
|       | 43         | 0.604              | 1.157     | 0.438 |
|       | 89         | 0.581              | 1.129     | 0.453 |
|       | 111        | 0.651              | 1.198     | 0.426 |
|       | 123        | 0.842              | 1.368     | 0.314 |
|       | 176        | 0.850              | 1.383     | 0.285 |
|       | 199        | 0.765              | 1.309     | 0.353 |
|       | 219        | 0.654              | 1.211     | 0.409 |
|       | 429        | 0.983*             | 1.488     | 0.094 |
|       | 607        | 0.791              | 1.329     | 0.341 |
|       | 609        | 0.544              | 1.071     | 0.488 |
|       | 616        | 0.984*             | 1.489     | 0.092 |
|       | 620        | 0.837              | 1.370     | 0.301 |

\*: posterior probability > 0.95
